# Supplementary material
Source: PubMed Central journal article supplement (PMC10583890)

Table S1: Additional empirical results for estimators of causal effect of each additional unit exposure on outcome for the additive model

|                     |                                       | $\theta_2 = -4$  |      |      |                  |           |      |      |      |
|---------------------|---------------------------------------|------------------|------|------|------------------|-----------|------|------|------|
|                     |                                       | $\gamma_2 = 0.5$ |      |      | $\gamma_2 = 0.2$ |           |      |      |      |
| Method of Analysis  | EBIAS/ABIAS                           | ESE              | ASE  | ECP  | EBIAS/ABIAS      | ESE       | ASE  | ECP  |      |
| <b>P(X=0)=0.25</b>  |                                       |                  |      |      |                  |           |      |      |      |
| $\beta_1 = \log(2)$ | Unadjusted                            | 0.50             | 0.10 | 0.10 | 0.01             | 0.88      | 0.13 | 0.10 | 0.00 |
|                     | Regression Adjustment                 | 0.17             | 0.09 | 0.08 | 0.37             | 0.31      | 0.12 | 0.10 | 0.07 |
|                     | Generalized Propensity Score          | 0.17/0.18        | 0.09 | 0.10 | 0.61             | 0.31/0.33 | 0.12 | 0.11 | 0.11 |
|                     | Two-part Generalized Propensity Score | 0.00             | 0.09 | 0.10 | 0.98             | 0.00      | 0.10 | 0.09 | 0.96 |
| $\beta_1 = \log(5)$ | Unadjusted                            | 0.54             | 0.12 | 0.10 | 0.00             | 0.93      | 0.14 | 0.12 | 0.00 |
|                     | Regression Adjustment                 | 0.18             | 0.11 | 0.08 | 0.39             | 0.34      | 0.19 | 0.11 | 0.03 |
|                     | Generalized Propensity Score          | 0.18/0.19        | 0.11 | 0.10 | 0.64             | 0.34/0.34 | 0.19 | 0.12 | 0.07 |
|                     | Two-part Generalized Propensity Score | 0.00             | 0.12 | 0.10 | 0.94             | 0.00      | 0.14 | 0.11 | 0.95 |
| <b>P(X=0)=0.5</b>   |                                       |                  |      |      |                  |           |      |      |      |
| $\beta_1 = \log(2)$ | Unadjusted                            | 0.52             | 0.12 | 0.10 | 0.02             | 0.87      | 0.13 | 0.11 | 0.00 |
|                     | Regression Adjustment                 | 0.20             | 0.10 | 0.09 | 0.18             | 0.33      | 0.11 | 0.10 | 0.07 |
|                     | Generalized Propensity Score          | 0.20/0.20        | 0.10 | 0.10 | 0.47             | 0.33/0.34 | 0.11 | 0.11 | 0.10 |
|                     | Two-part Generalized Propensity Score | 0.00             | 0.11 | 0.10 | 0.97             | 0.00      | 0.07 | 0.07 | 0.98 |
| $\beta_1 = \log(5)$ | Unadjusted                            | 0.60             | 0.11 | 0.10 | 0.00             | 0.95      | 0.13 | 0.10 | 0.00 |
|                     | Regression Adjustment                 | 0.22             | 0.09 | 0.08 | 0.15             | 0.39      | 0.14 | 0.10 | 0.01 |
|                     | Generalized Propensity Score          | 0.22/0.25        | 0.09 | 0.10 | 0.32             | 0.39/0.39 | 0.14 | 0.11 | 0.01 |
|                     | Two-part Generalized Propensity Score | -0.01            | 0.12 | 0.11 | 0.92             | 0.00      | 0.10 | 0.09 | 0.95 |

EBIAS: Empirical bias/Asymptotic bias  
 ESE: Empirical standard error  
 ASE: Asymptotic standard error  
 ECP: Empirical coverage probability

Table S2: Additional empirical results for estimators of causal effect of each additional unit exposure on outcome for the multiplicative model

|                     |                                       | $\theta_2 = -4$  |      |                  |      |             |      |      |      |
|---------------------|---------------------------------------|------------------|------|------------------|------|-------------|------|------|------|
|                     |                                       | $\gamma_2 = 0.5$ |      | $\gamma_2 = 0.2$ |      |             |      |      |      |
| Method of Analysis  |                                       | EBIAS/ABIAS      | ESE  | ASE              | ECP  | EBIAS/ABIAS | ESE  | ASE  | ECP  |
| <b>P(X=0)=0.25</b>  | $\beta_1 = \log(2)$                   | -0.63            | 0.10 | 0.10             | 0.01 | -0.81       | 0.11 | 0.09 | 0.00 |
|                     | Regression Adjustment                 | -0.28            | 0.09 | 0.08             | 0.37 | -0.31       | 0.12 | 0.09 | 0.05 |
|                     | Generalized Propensity Score          | -0.28/-0.29      | 0.09 | 0.10             | 0.61 | -0.31/-0.32 | 0.12 | 0.09 | 0.05 |
|                     | Two-part Generalized Propensity Score | 0.00             | 0.09 | 0.10             | 0.98 | 0.00        | 0.08 | 0.08 | 0.90 |
| $\beta_1 = \log(5)$ | Unadjusted                            | -0.66            | 0.10 | 0.08             | 0.01 | 0.86        | 0.15 | 0.10 | 0.00 |
|                     | Regression Adjustment                 | 0.31             | 0.11 | 0.08             | 0.01 | 0.37        | 0.23 | 0.10 | 0.01 |
|                     | Generalized Propensity Score          | 0.31/0.33        | 0.11 | 0.08             | 0.01 | 0.37/0.35   | 0.23 | 0.11 | 0.01 |
|                     | Two-part Generalized Propensity Score | 0.00             | 0.09 | 0.07             | 0.95 | 0.02        | 0.15 | 0.09 | 0.93 |
| <b>P(X=0)=0.5</b>   | $\beta_1 = \log(2)$                   | -0.62            | 0.10 | 0.09             | 0.00 | -0.77       | 0.10 | 0.10 | 0.00 |
|                     | Regression Adjustment                 | -0.28            | 0.11 | 0.08             | 0.05 | -0.31       | 0.10 | 0.10 | 0.03 |
|                     | Generalized Propensity Score          | -0.28/-0.29      | 0.11 | 0.08             | 0.05 | -0.31/-0.32 | 0.10 | 0.10 | 0.03 |
|                     | Two-part Generalized Propensity Score | 0.00             | 0.08 | 0.08             | 0.96 | 0.00        | 0.06 | 0.06 | 0.96 |
| $\beta_1 = \log(5)$ | Unadjusted                            | -0.68            | 0.10 | 0.09             | 0.00 | -0.83       | 0.11 | 0.10 | 0.00 |
|                     | Regression Adjustment                 | -0.33            | 0.10 | 0.08             | 0.00 | -0.38       | 0.13 | 0.09 | 0.01 |
|                     | Generalized Propensity Score          | -0.34/-0.38      | 0.10 | 0.08             | 0.00 | -0.38/-0.39 | 0.13 | 0.09 | 0.01 |
|                     | Two-part Generalized Propensity Score | 0.01             | 0.08 | 0.07             | 0.94 | 0.00        | 0.07 | 0.06 | 0.96 |

EBIAS: Empirical bias/Asymptotic bias  
ESE: Empirical standard error  
ASE: Asymptotic standard error  
ECP: Empirical coverage probability

Fig. S1: Regression diagnostic plots of the outcome model

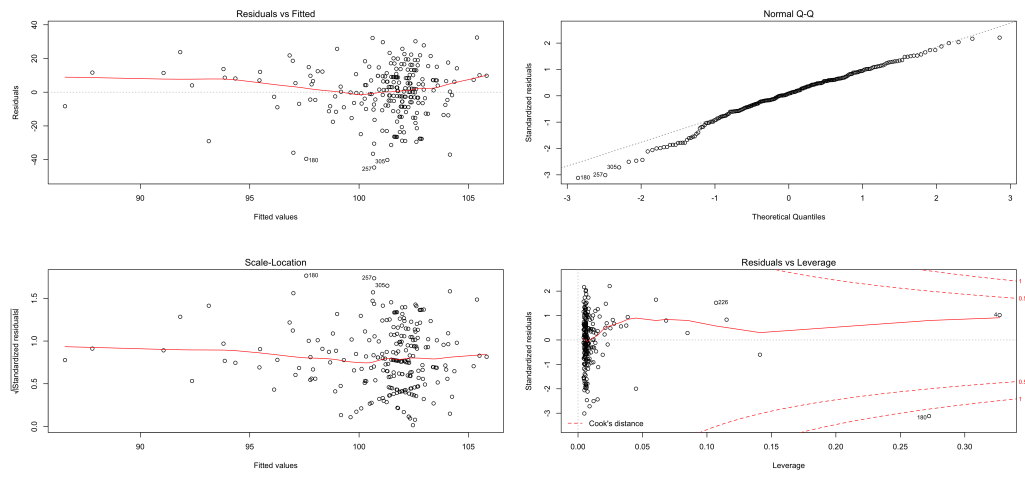

Supplement: NIHMS1933741-supplement-Supplementary_Info.pdf [file NIHMS1933741-supplement-Supplementary_Info.pdf]
